# Supplementary material
Source: Research Square preprint supplement (doi:10.21203/rs.3.rs-9551100/v1)
Supplement: Supplementary file 1 [file b69c3157209bfbe73f00fdac.docx]

**Pt-WOx/TiO2 catalyst for nitrogen oxide to ammonia reaction using H­2 reductant**

Chandan Chaudhari,*a Yuichi Manaka *a,b and Tetsuya Nanbaa

aRenewable Energy Advanced Research Center, National Institute of Advanced Industrial Science and Technology (AIST), 2-2-9 Machiikedai, Koriyama, Fukushima, 963-0298 Japan

bSchool of Materials and Chemical Technology, Institute of Science Tokyo, 2-12-1 Okayama, Meguro-ku, Tokyo, 152-8552 Japan

***Corresponding authors**

Chandan Chaudhari and Yuichi Manaka

Email: [chandan.chaudhari@aist.go.jp](mailto:chandan.chaudhari@aist.go.jp)

Email: [yuichi.manaka@aist.go.jp](mailto:yuichi.manaka@aist.go.jp)


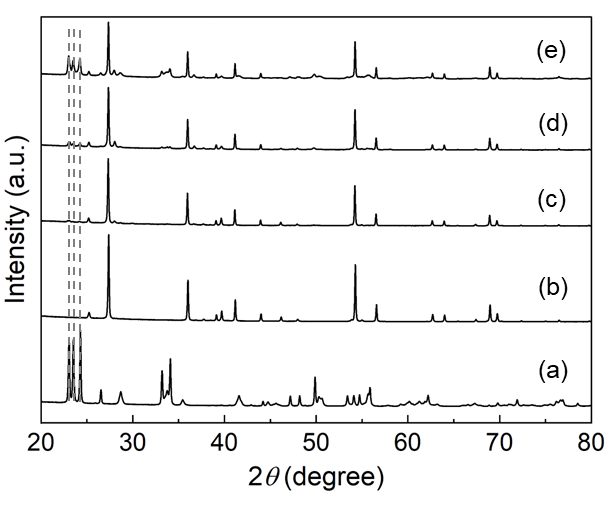


**Fig. S1** XRD analysis of commercial WO3 (a) and unreduced catalysts; Pt-1WOx/TiO2 (b), Pt-5WOx/TiO2 (c) Pt-10WOx/TiO2 (d) and Pt-20WOx/TiO2 (e)


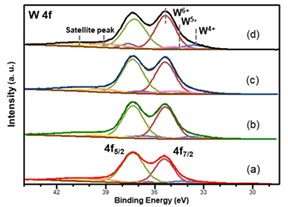


**Fig. S2** XRS spectra of W 4f of Pt-1 wt% WOx/TiO2 (a), Pt-5 wt% WOx/TiO2 (b) Pt-10 wt% WOx/TiO2 (c) and Pt-20 wt% WOx/TiO2 (d)

**Table S1** Percentage of the various oxidation states of WO3 in WOx-doped Pt/TiO2 catalyst

| Catalyst | W reduction degree (%) | | W concentration | | |
| --- | --- | --- | --- | --- | --- |
| **W6+ (%)** | **W5+ (%)** | **W4+ (%)** |
| Pt-1 wt% WOx/TiO2 | | 5 | 94.6 | 5.4 | - |
| Pt-5 wt% WOx/TiO2 | | 6 | 94.0 | 0.9 | 5.1 |
| Pt-10 wt% WOx/TiO2 | | 12 | 91.2 | 2.1 | 6.7 |
| Pt-20 wt% WOx/TiO2 | | 14 | 87.7 | 5.4 | 6.9 |


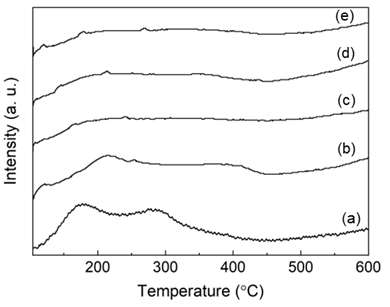


**Fig. S3** NH3-TPD Pt/TiO2 (a) Pt-1 wt% WOx/TiO2 (b), Pt-5 wt% WOx/TiO2 (c) Pt-10 wt% WOx/TiO2 (d) and Pt-20 wt% WOx/TiO2 (e)

**Table S2** Physiochemical properties of undoped Pt/TiO2 and WOx-doped Pt/TiO2 catalyst

| Catalyst | CO uptake  (mmol/g)a | | Desorbed NH3  (mmol/g)b |
| --- | --- | --- | --- |
| Pt-/TiO2 | | 0.269 | 0.046 |
| Pt-1 wt% WOx/TiO2 | | 0.005 | 0.057 |
| Pt-5 wt% WOx/TiO2 | | 0.002 | 0.049 |
| Pt-10 wt% WOx/TiO2 | | 0.001 | 0.044 |
| Pt-20 wt% WOx/TiO2 | | 0 | 0.041 |

aCO-Chemisorption

bNH3-TPD
